# Supplementary material
Source: publisher figshare collection journal article supplement (https://rs.figshare.com/ndownloader/files/14668577)
Supplement: Supplementary file 1 [file 14668577]

## Sheet: Sheet1
	FAD	LAD	Formation (or Zone)	Stage
Mesosaurus_tenuidens	290.1	279.5	Irati formation, Huab formation, Whitehill formation	Artinskian/Kungurian
Stereosternum_tumidum	290.1	279.5	Irati formation, San Miguel formation, Whitehill formation	Artinskian/Kungurian
Brazilosaurus_sanpauloensis	290.1	279.5	Irati formation	Artinskian/Kungurian
Milleretta_rubidgei	254	252.3	Balfour formation	Wuchiapingian/Changhsingian
Broomia_perplexa	265	259	Koonap formation	Capitanian
Milleropsis_pricei	259	252.3	Balfour formation	Wuchiapingian/Changhsingian
Millerosaurus_nuffieldi	259	252.3	Balfour formation	Wuchiapingian/Changhsingian
Millerosaurus_ornatus	259	252.3	Balfour formation	Wuchiapingian/Changhsingian
Erpetonyx_arsenaultorum	303.4	298.9	Egmont Bay formation	Gzhelian
Eudibamus_cursoris	290.1	279.5	Tambach formation	Artinskian
Belebey_vegrandis	268	265	Belebei formation	Wordian
Belebey_maximi	268	265	Belebei formation	Wordian
Belebey_chengi	272.5	268	Qingtoushan formation	Roadian
Bolosaurus_grandis	289.2	286.2	Garber formation	Artinskian
Bolosaurus_striatus	290.1	279.5	Nocona formation, Admiral formation, Archer City formation, Garber formation	Artinskian/Kungurian
Australothyris_smithi	265	261.2	Abrahamskraal formation	Capitanian
Acleistorhinus_pteroticus	279.5	272.5	Hennessey formation	Kungurian
Chalcosaurus_rossicus	268	265	Estemmenosuchus uralensis zone	Wordian
Lanthaniscus_efremovi	272.5	265	Ennatosaurus tecton zone	Roadian/Wordian
Lanthanosuchus_watsoni	268	252.3	Titanophoneus potens zone	Wordian/Capitanian
Delorhynchus_priscus	289.2	286.2	Garber formation	Artinskian
Delorhynchus_cifellii	289.2	286.2	Garber formation	Artinskian
Colobomycter_pholeter	289.2	286.2	Garber formation	Artinskian
Colobomycter_vaughni	289.2	286.2	Garber formation	Artinskian
Feeserpeton_oklahomensis	289.2	286.2	Garber formation	Artinskian
Microleter_mckinzieorum	289.2	286.2	Garber formation	Artinskian
Nyctiphruretus_acudens	272.5	265	Ennatosaurus tecton zone, Scutosaurus karpinskii zone	Roadian/Wordian
Abyssomedon_williamsi	289.2	286.2	Garber formation	Artinskian
Barasaurus_besairei	252.3	247.2	Lower Sakamena formation, Middle Sakamena formation	Changhsingian/Induan
Saurodektes_rogersorum	252.3	251.3	Balfour formation	Induan
Ruhuhuaria_reiszi	247.2	242	Manda Beds formation	Anisian
Candelaria_barbouri	242	235	Santa Maria formation	Ladinian
Owenetta_rubidgei	259	254	Balfour formation	Wuchiapingian/Changhsingian
Owenetta_kitchingorum	252.3	251.3	Katberg formation, Balfour formation	Induan
Kitchingnathus_untabeni	251.3	247.2	Katberg formation	Olenekian
Phaanthosaurus_ignatjevi	252.3	251.3	Vokhminskaya formation	Induan
Sauropareion_anoplus	252.3	247.2	Balfour formation	Induan/Olenekian
Pintosaurus_magnidentis	235	201.6	Buena Vista formation	Carnian/Norian/Rhaetian
Coletta_seca	251.3	247.2	Katberg formation	Olenekian
Theledectes_perforatus	247.2	242	Burgersdorp formation	Anisian
Eumetabolodon_dongshengensis	252.3	247.2	"Shihtienfeng" formation	Induan/Olenekian
Phaanthosaurus_simus	252.3	251.3	Vokhminskaya formation, Kopanskaya formation	Induan
Tichvinskia_vjatkensis	251.3	247.2	Petropavlovka formation, Kzylsaiskaya Formation, Staritskaya Formation	Olenekian
Pentaedrusaurus_ordosianus	251.3	242	Heshanggou formation	Olenekian/Anisian
Neoprocolophon_asiaticus	247.2	242	Ermaying formation	Anisian
Phonodus_dutoitorum	252.3	251.3	Katberg formation	Induan
Mandaphon_nadra	247.2	242	Manda Beds formation	Anisian
Scoloparia_glyphanodon	235	221.5	Wolfville formation	Carnian/Norian
Sclerosaurus_armatus	247.2	242	Plattensandstein or Rötton formation, Plattensandstein formation	Anisian
Soturnia_caliodon	221.5	205.6	Caturrita formation	Norian
Hypsognathus_fenneri	221.5	201.6	Wolfville formation, Blomidon formation, New Haven formation, Passaic formation	Norian/Rhaetian
Leptopleuron_lacertinum	235	205.6	Lossiemouth Sandstone formation	Carnian/Norian
Eumetabolodon_bathycephalus	247.2	242	Heshanggou formation, "Shihtienfeng" formation, Ermaying formation	Anisian
Procolophon_trigoniceps	251.3	247.2	Katberg formation, Normandien formation, Sanga do Cabral formation, Fremouw formation	Induan/Olenekian
Thelerpeton_oppressus	247.2	242	Burgersdorp formation	Anisian
Teratophon_spinigensis	247.2	242	Burgersdorp formation	Anisian
Timanophon_raridentatus	251.3	247.2	Charkabozh formation, Pizhmomezenskoi formation	Induan/Olenekian
Thelephon_contritus	247.2	242	Burgersdorp formation	Anisian
Anomoiodon_liliensterni	247.2	242	Solling Formation	Anisian
Kapes_amaenus	251.3	247.2	Yarenskian formation	Olenekian
Kapes_betoni	247.2	242	Otter Sandstone formation	Anisian
Kapes_komiensis	251.3	247.2	Yarenskian formation	Olenekian
Kapes_majmesculae	251.3	247.2	Petropavlovka formation	Olenekian
Bradysaurus_baini	265	261.2	Abrahamskraal formation	Capitanian
Bradysaurus_seeleyi	265	261.2	Abrahamskraal formation	Capitanian
Nochelesaurus_alexandri	265.1	259.1	Abrahamskraal formation, Tapinocephalus assemblage zone	Capitanian
Embrithosaurus_schwarzi	265.1	259.1	Abrahamskraal formation, Tapinocephalus assemblage zone	Capitanian
Bunostegos_akokanensis	254	252.3	Moradi formation	Changhsingian
Deltavjatia_vjatkensis	265	252.3	Urpalov formation	Capitanian/Wuchiapingian/Changhsingian
Parasaurus_geinitzi	259	254	Werra formation	Wuchiapingian
Honania_complicidentata	259	254	Shangshihezi formation	Wuchiapingian
Shihtienfenia_permica	254	252.3	"Shihtienfeng" formation	Changhsingian
Pareiasuchus_nasicornis	259	254	Middleton or Balfour formation, Madumabisa Mudstone formation	Wuchiapingian
Pareiasuchus_peringueyi	259	254	Tropidostoma assemblage zone	Wuchiapingian
Obirkovia_gladiator	259	252.3	Salarevo Formation	Wuchiapingian/Changhsingian
Shansisaurus_xuecunensis	254	252.3	"Shihtienfeng" formation	Changhsingian
Scutosaurus_karpinskii	265	254	Malokinelskaya formation, Proelginia permiana zone	Capitanian/Wuchiapingian
Pareiasaurus_serridens	259	254	Teekloof formation, Balfour formation	Wuchiapingian
Arganaceras_vacanti	259	254	Ikakern formation	Wuchiapingian
Elginia_mirabilis	254	252.3	Cutties Hillock Sandstone formation	Changhsingian
Nanoparia_luckhoffi	259	254	Cistecephalus assemblage zone	Wuchiapingian
Provelosaurus_americanus	268	259	Rio do Rasto formation	Wordian/Capitanian
Pumiliopareia_pricei	259	254	Cistecephalus assemblage zone	Wuchiapingian
Anthodon_serrarius	259	254	Balfour formation, Usili formation	Wuchiapingian
Bashkyroleter_mesensis	272.5	265	Ennatosaurus tecton zone	Wordian
Bashkyroleter_bashkyricus	268	265	Belebei formation	Wordian
Macroleter_poezicus	268	265	Belebei formation, Ennatosaurus tecton zone	Wordian
Macroleter_agilis	272.5	265	Chickasha formation	Roadian/Wordian
Nycteroleter_ineptus	272.5	265	Ennatosaurus tecton zone	Roadian/Wordian
Rhipaeosaurus_tricuspidens	268	265	Belebei formation, Ennatosaurus tecton zone	Wordian
Emeroleter_levis	265	252.3	Urpalov formation	Capitanian/Wuchiapingian/Changhsingian
